# Supplementary material
Source: ML conference proceedings conference paper supplement (https://openreview.net/forum?id=gx1wHnf5Vp)

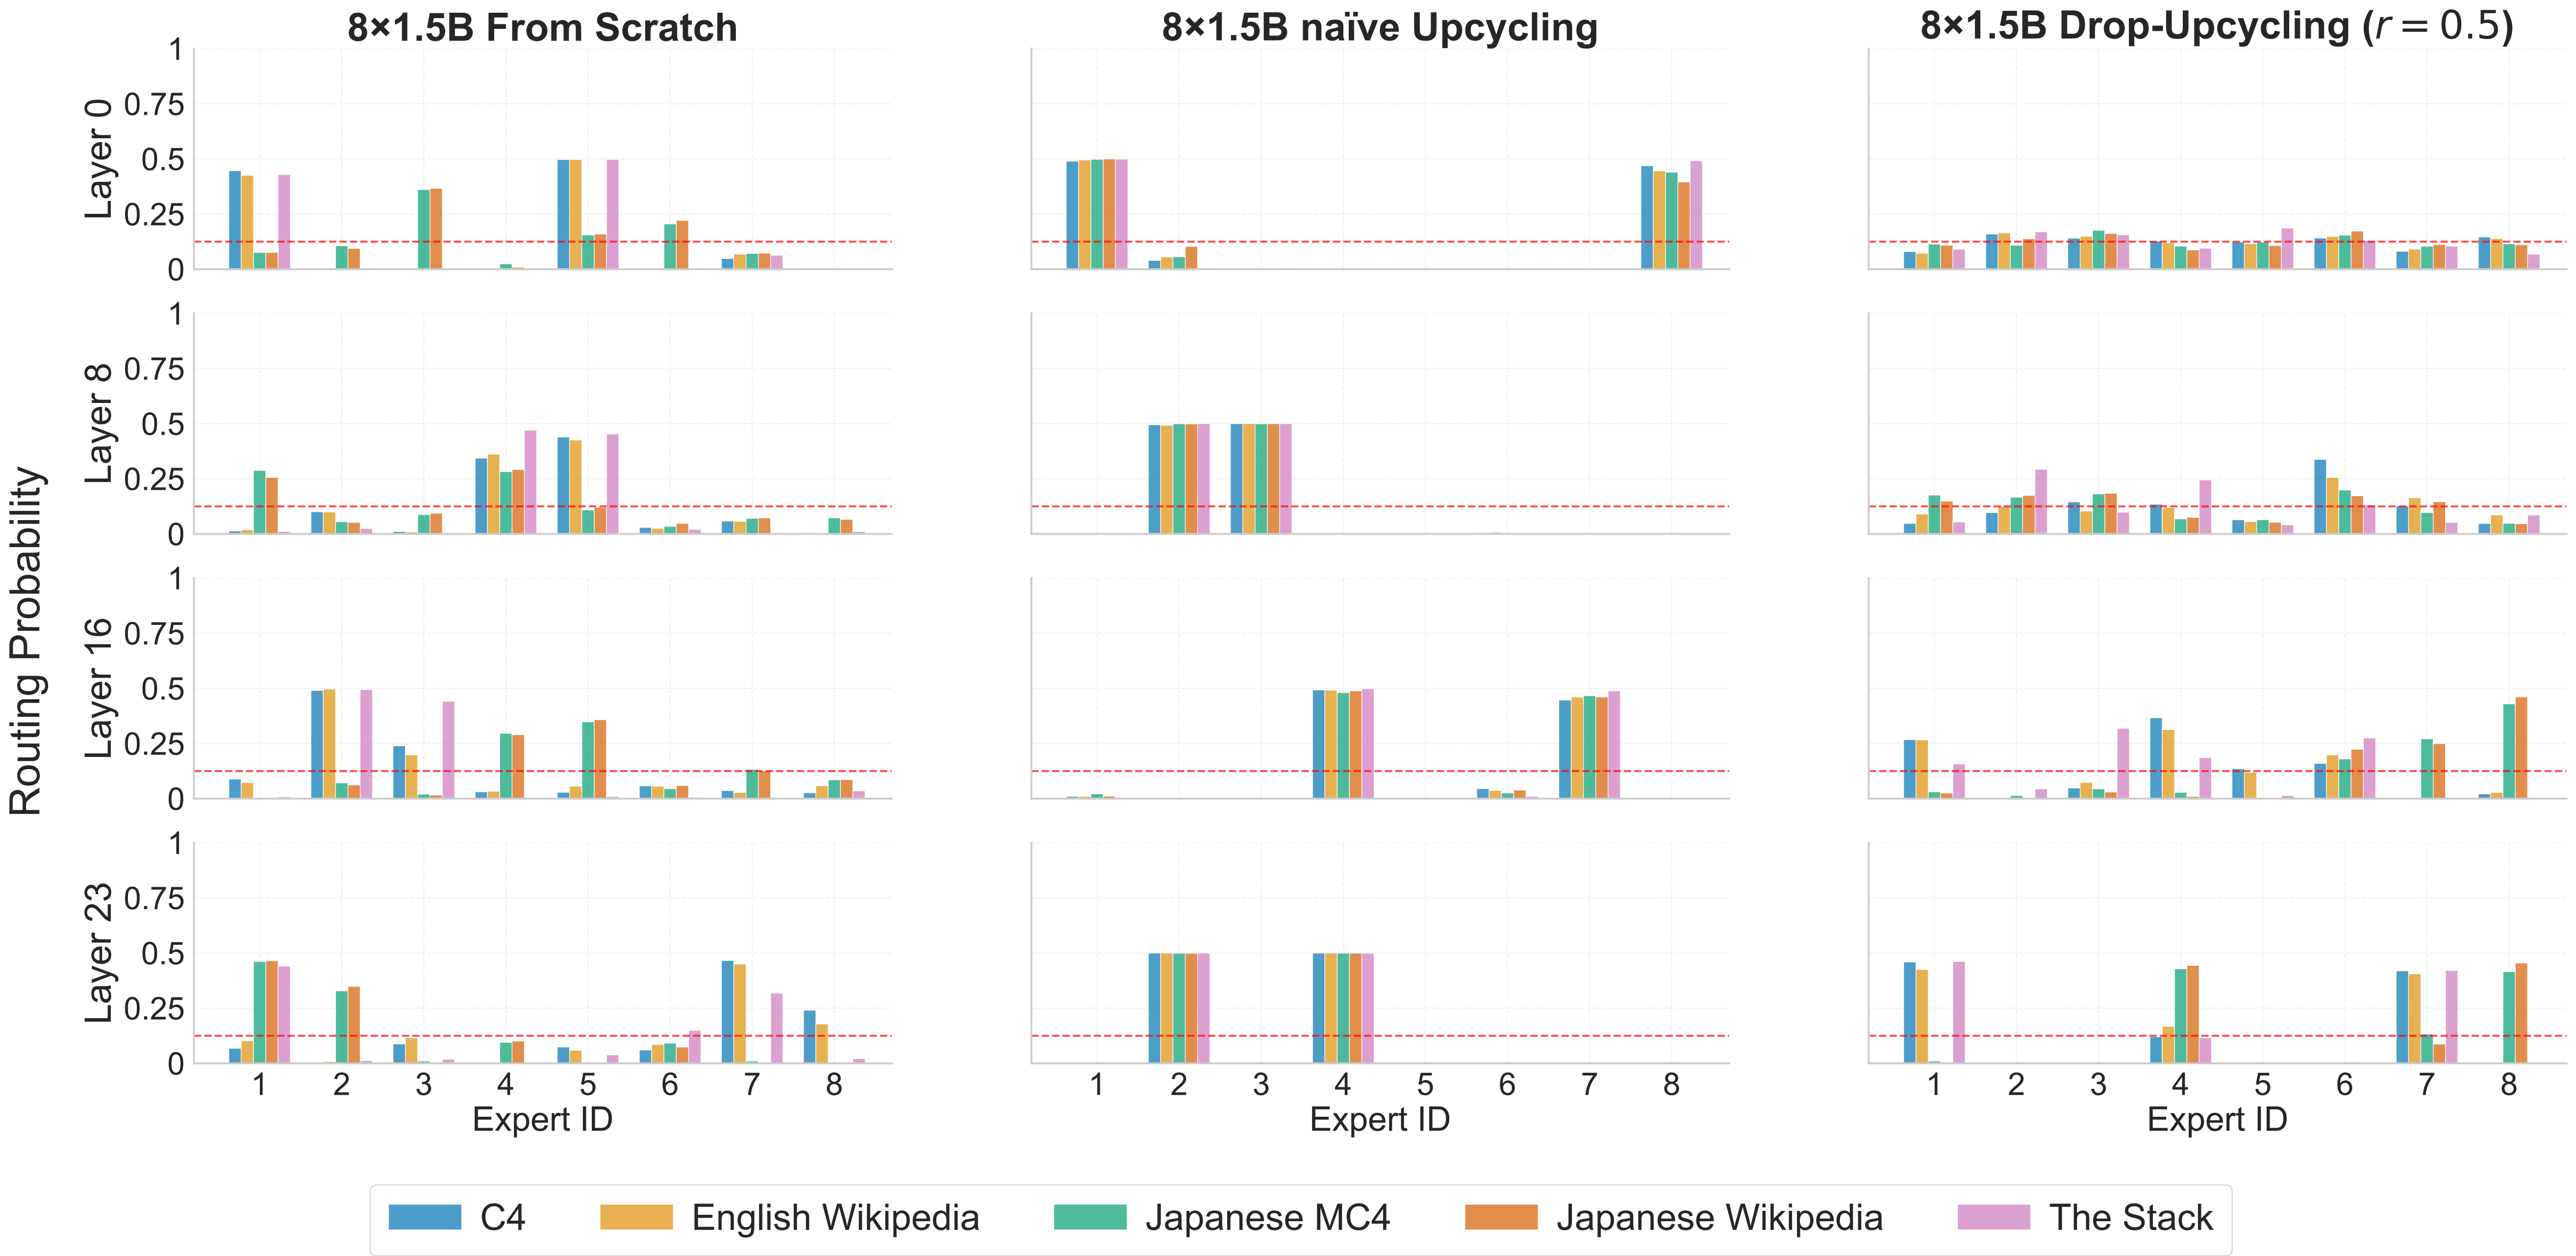

Supplement: supplementary_material [file attachment]
